# Supplementary material for: Two-step synthesis of luminescent MoS2–ZnS hybrid quantum dots
Source: Royal Society of Chemistry journal article supplement (doi:10.1039/c5nr04790k), 2015-01-01
Supplement: c5nr04790k1.pdf [file c5nr04790k1.pdf]

## Supplementary Information

### Two-step synthesis of luminescent MoS<sub>2</sub>-ZnS hybrid quantum dots

Rhiannon M. Clark,<sup>a,b</sup> Benjamin J. Carey,<sup>a,b</sup> Torben Daeneke,<sup>\*a</sup> Paul Atkin,<sup>a,b</sup>

Madhu Bhaskaran,<sup>c</sup> Kay Latham,<sup>d</sup> Ivan S. Cole<sup>b</sup> and Kourosh Kalantar-zadeh<sup>\*a</sup>

---

*a. School of Electrical and Computer Engineering, RMIT University, Melbourne, Victoria, 3001, Australia*

*b. Manufacturing Flagship, CSIRO, Clayton, Victoria, 3169, Australia*

*c. Functional Materials and Microsystems Research Group, RMIT University, Melbourne, Victoria, 3000, Australia*

*d. School of Applied Science, RMIT University, Melbourne, Victoria, 3001, Australia*

\* Torben.daeneke@rmit.edu.au, Kourosh.kalantar@rmit.edu.au

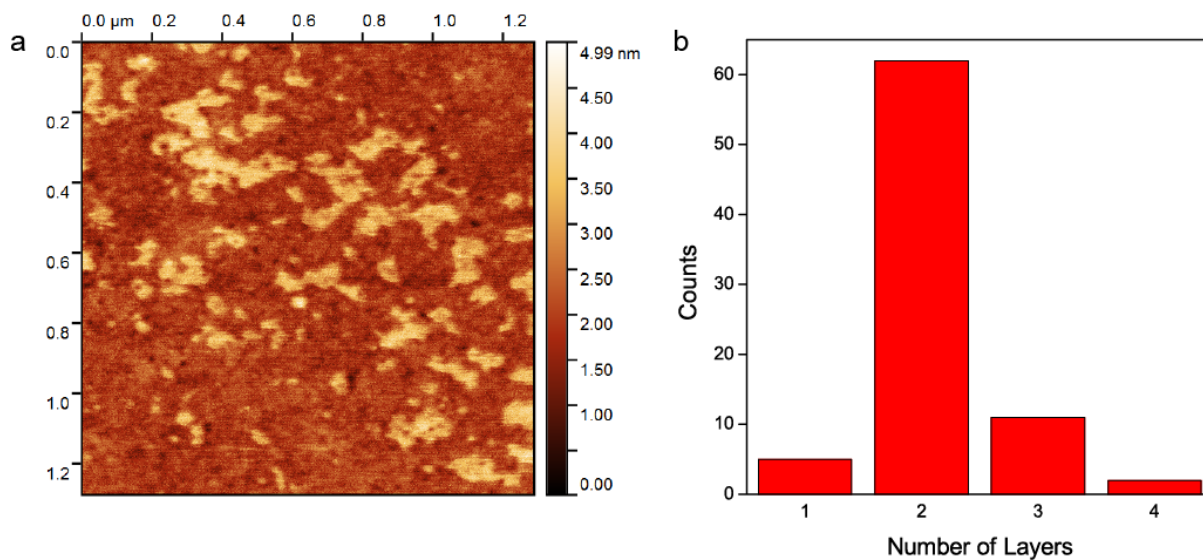

**Figure S1.** AFM characterisation of exfoliated MoS<sub>2</sub>. (a) AFM image. (b) Flake height histogram of 80 flakes in (a).

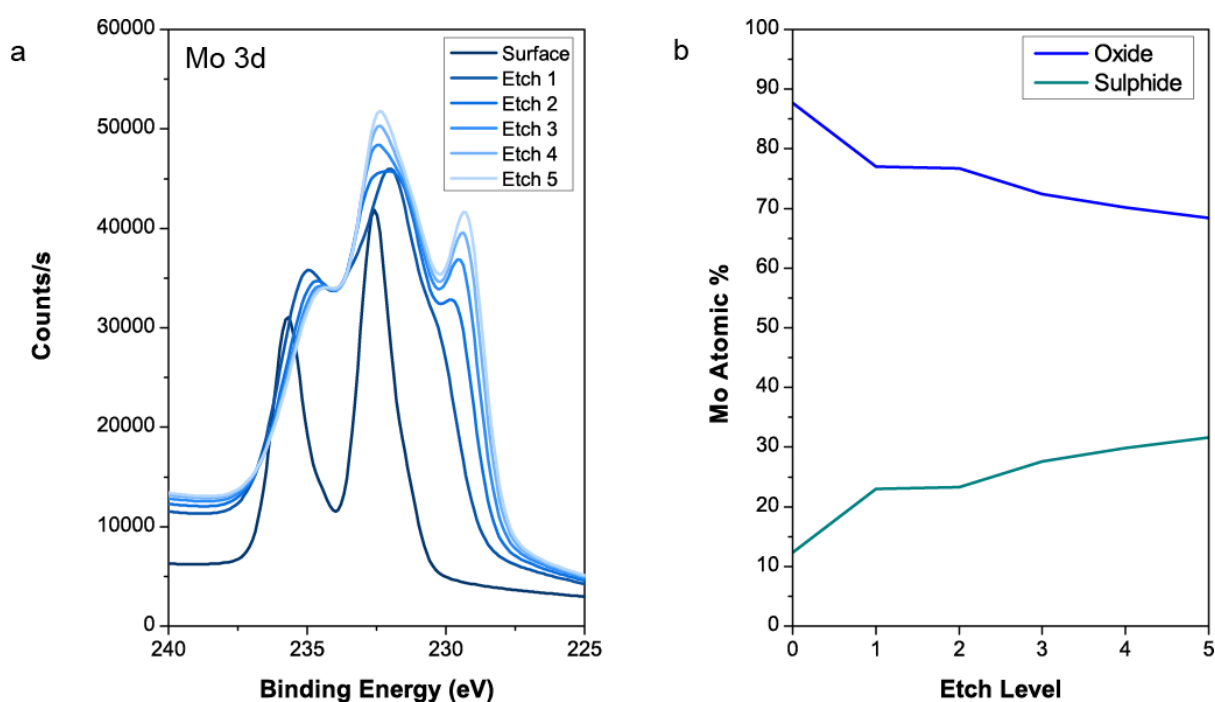

**Figure S2.** XPS etch level analysis of exfoliated MoS<sub>2</sub>: (a) Mo 3d energy range at different etch levels showing Mo<sup>6+</sup> at the surface and the evolution of the peaks for Mo<sup>4+</sup>. (b) Atomic percentage profile of Mo<sup>6+</sup> (oxide) and Mo<sup>4+</sup> (sulphide).

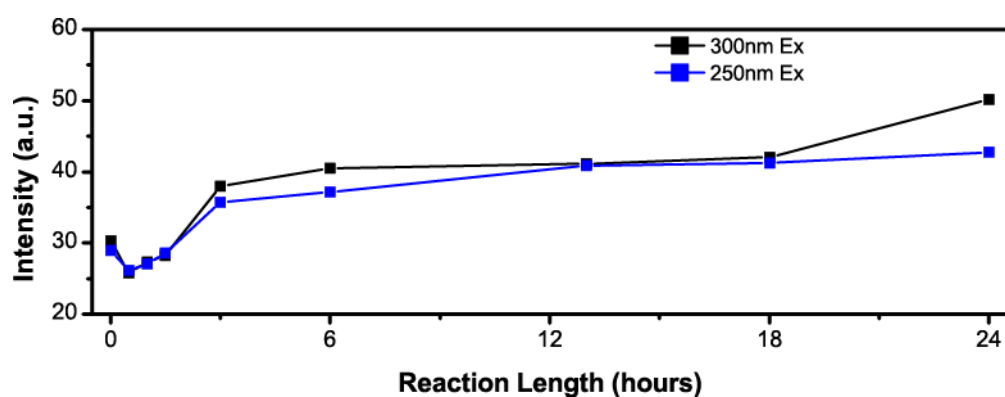

**Figure S3.** PL emission from MoS<sub>2</sub> QDs hydrothermally processed for different lengths of time.

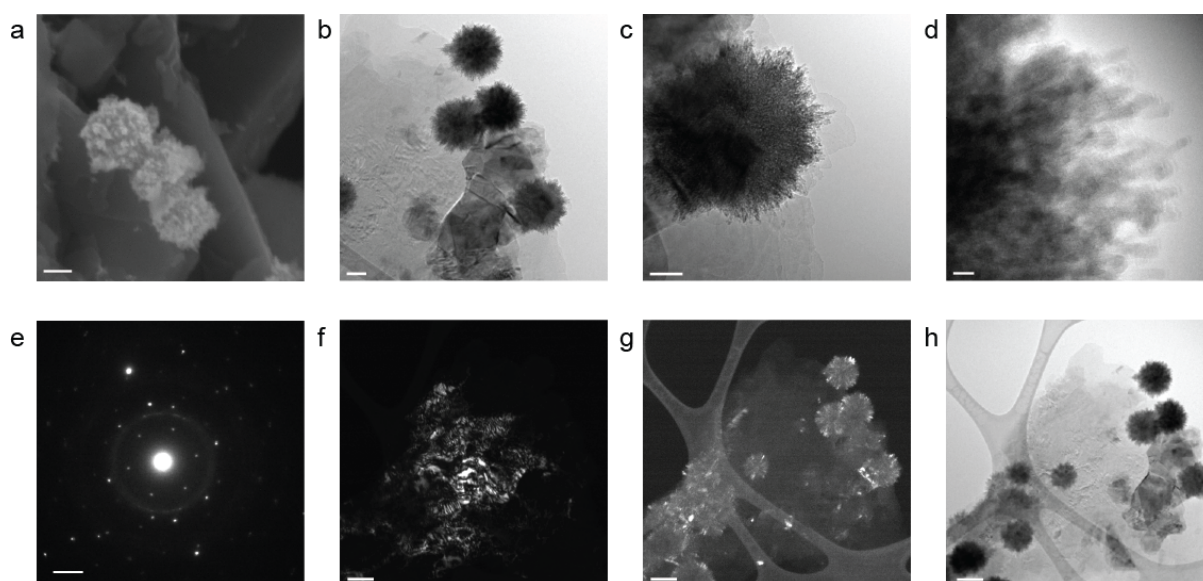

**Figure S4.** Characterisation of hydrothermal reaction precipitates using sediment MoS<sub>2</sub>: (a) SEM, scale bar 100 nm. (b) TEM, scale bar 100 nm. (c) TEM, scale bar 50 nm. (d) TEM, scale bar 5 nm. (e) SAED of area shown in (h), scale bar 2 nm<sup>-1</sup>. (f) Dark field image from spot in (e) showing distribution of MoS<sub>2</sub>, scale bar 200 nm. (g) Dark field image from ring in (e) showing distribution of ZnS, scale bar 200 nm. (h) TEM, scale bar 200 nm.

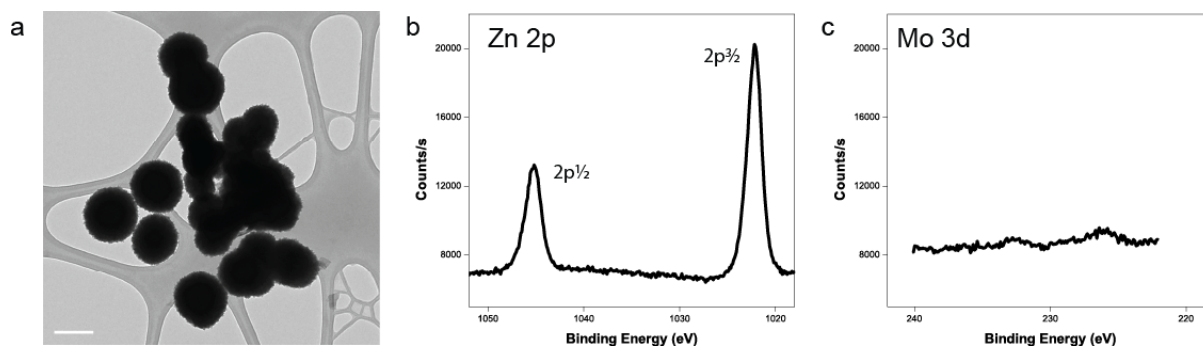

**Figure S5.** Characterisation of hydrothermal reaction precipitates: (a) TEM image showing spheres of 200-300 nm diameter, scale bar 200 nm. (b) XPS trace of Zn 2p energy range. (c) XPS trace of Mo 3d energy range showing absence of Mo.

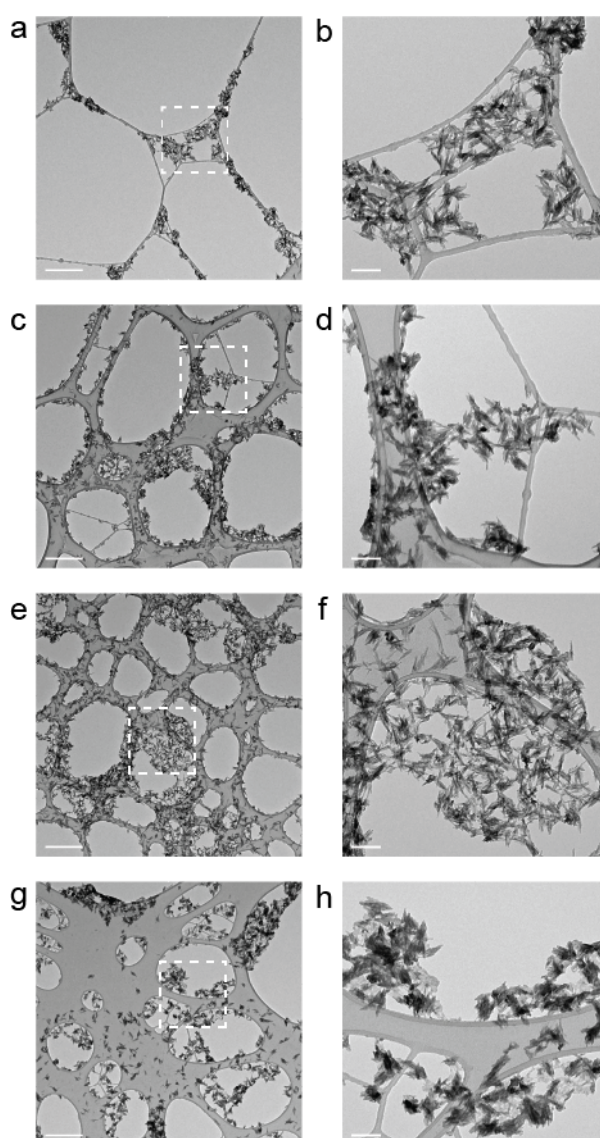

**Figure S6.** TEM characterisation of hydrothermal reaction supernatants: (a, c, e and g) 0.4, 0.6, 0.8 and 1.0 mM samples, scale bars 500 nm. (b, d, f and h) Higher magnification of the outlined square regions in (a, c, e and g), scale bars 100 nm.

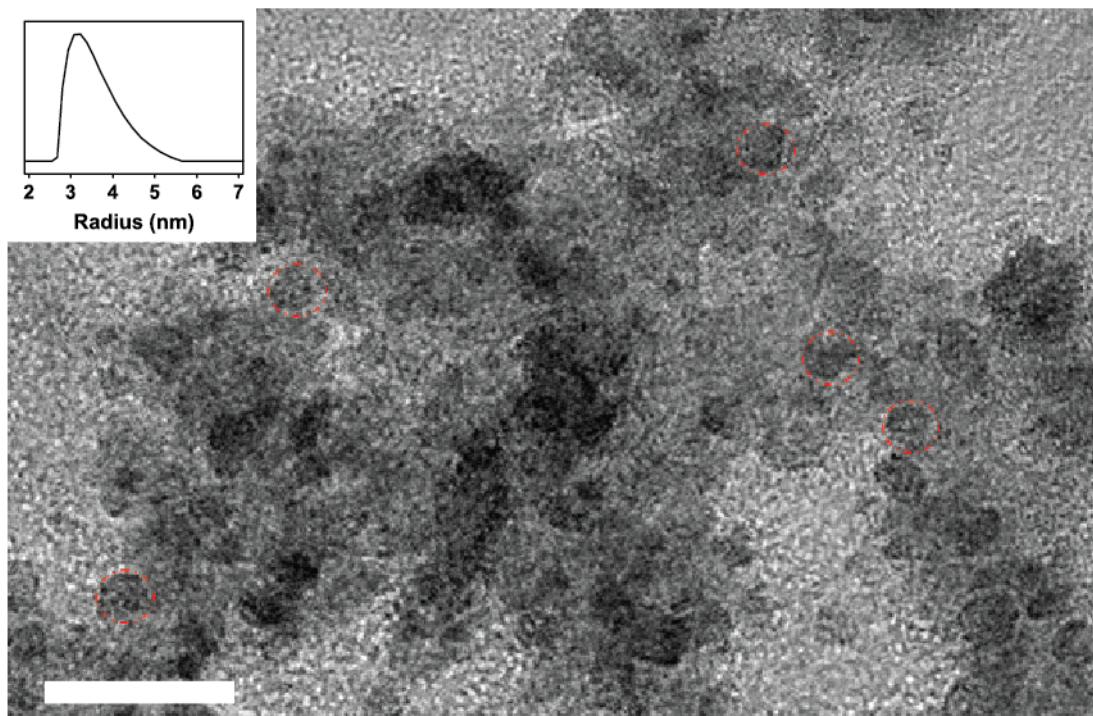

**Figure S7.** HRTEM of 1 mM sample with outlines of some single particles, scale bar 20nm. Inset number weighted radius statistics from dynamic light scattering of 1 mM sample.

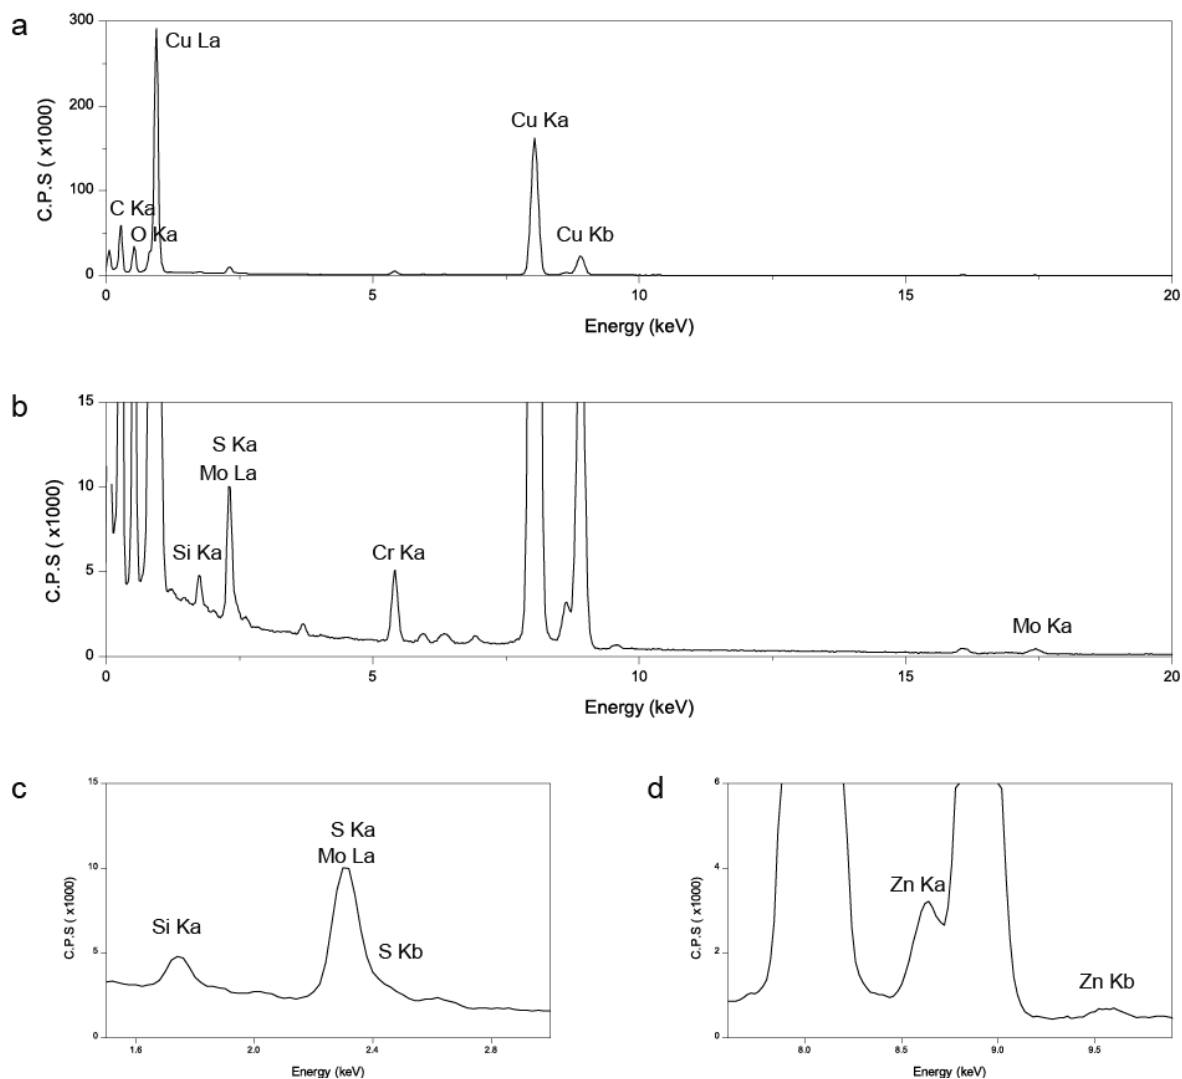

**Figure S8.** EDX analysis of 0.4 mM hydrothermal reaction supernatant: (a) Full analysis energy range. (b) Magnified baseline showing elemental composition. (c) Region showing overlap of the Mo La and S Ka peaks. (d) Region showing Zn peaks close to the intense Cu peaks from the grid.

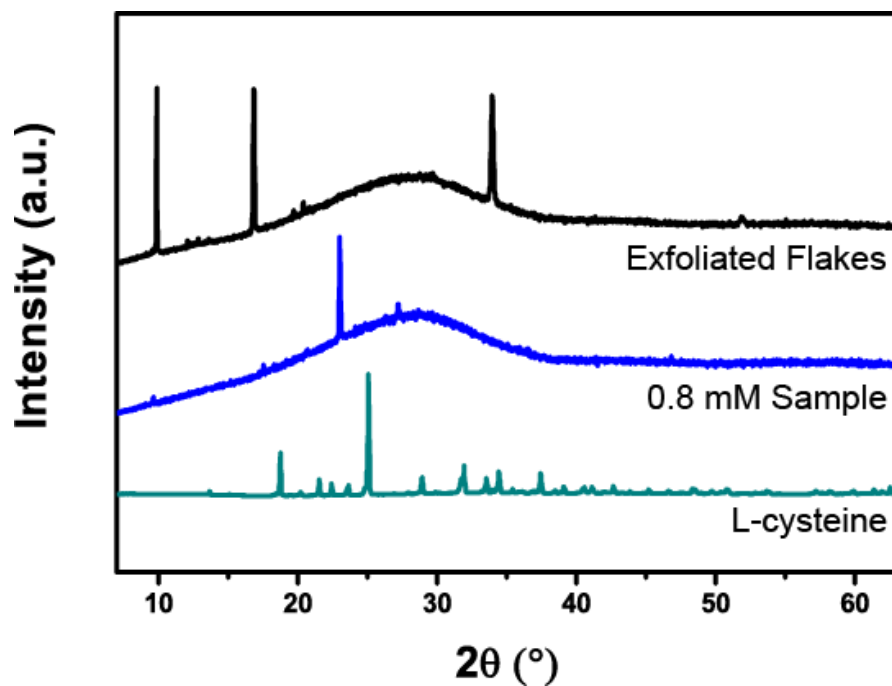

**Figure S9.** XRD patterns of exfoliated MoS<sub>2</sub> flakes (black), 0.8 mM sample (blue) and L-cysteine (green), peaks have been normalized by maximum intensity and offset for ease of comparison. The broad feature centred at approximately 28° in the top two patterns is due to the glass substrates. The 0.8 mM sample has consistent peaks at 9.6 and 17.5° from exfoliated MoS<sub>2</sub>, and additional peaks at 27.2 and 46.8° from ZnS.<sup>1</sup> After consideration of possible sources, it was found that the prominent peak at 23.0° may be due to unreacted L-cysteine present in the sample.

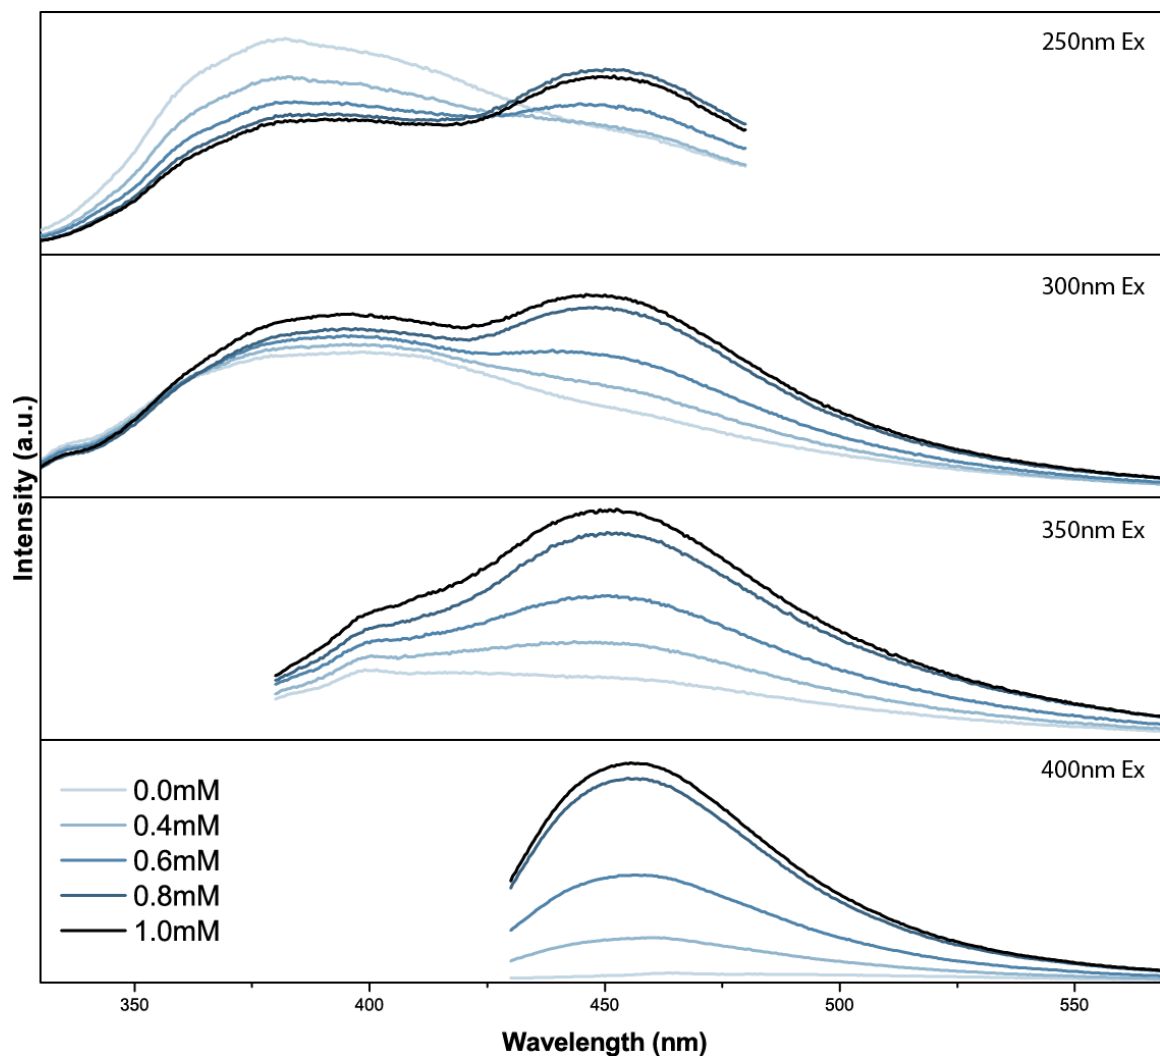

**Figure S10.** PL emission from hydrothermal reaction supernatants at excitation wavelengths of 250, 300, 350 and 400 nm from 0.0, 0.4, 0.6, 0.8 and 1.0 mM samples.



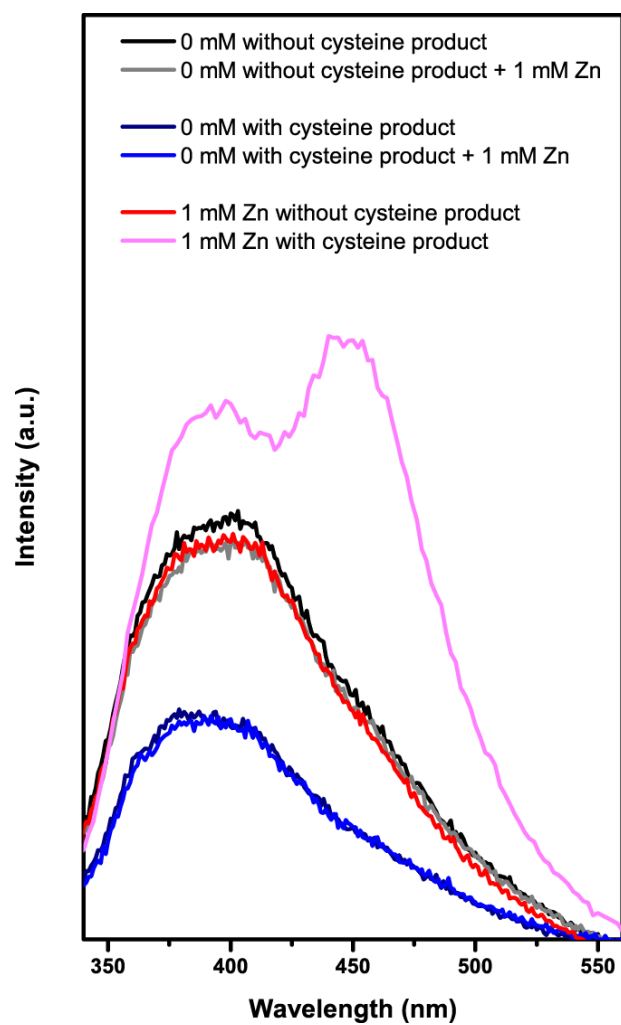

**Figure S11.** PL emission from products, before and after mixing with zinc nitrate hexahydrate.

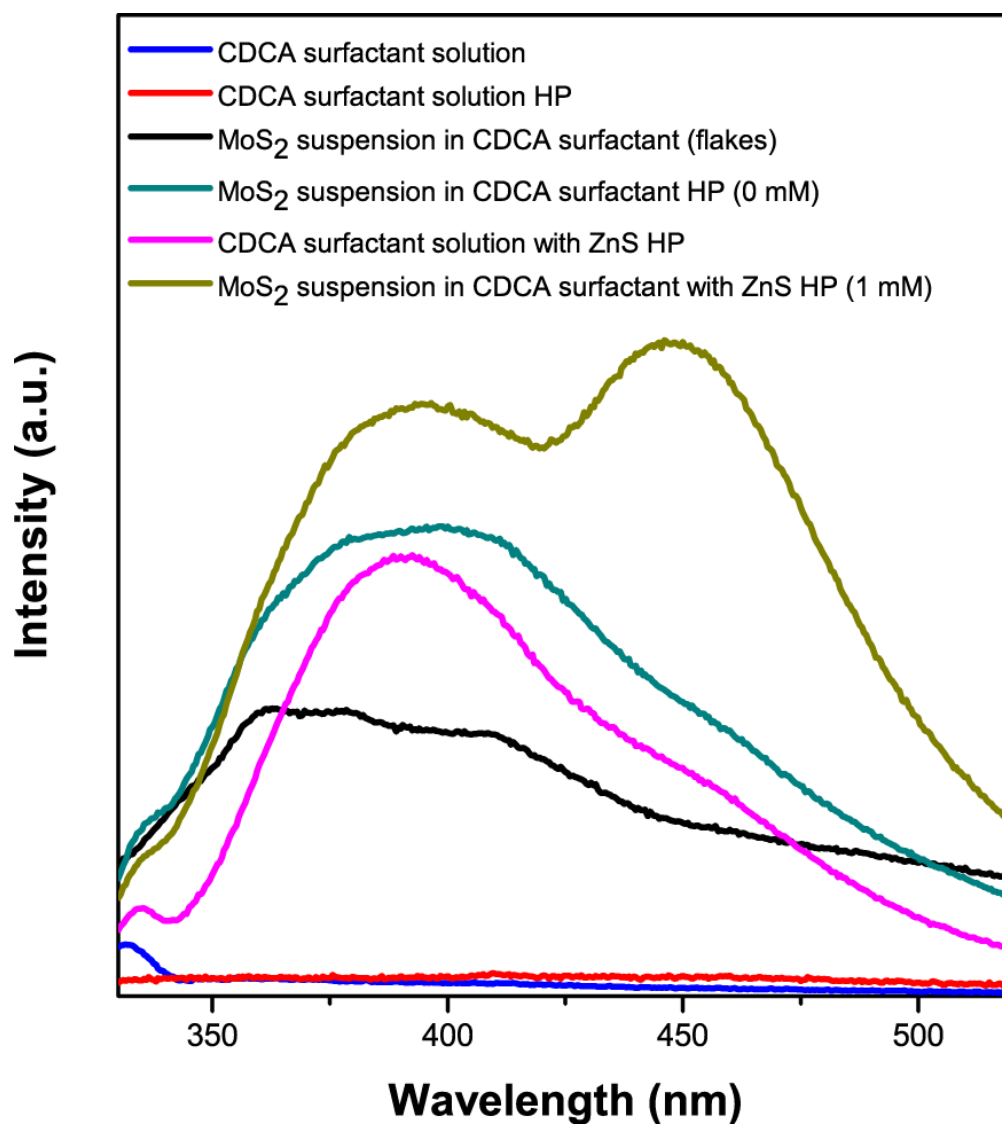

**Figure S12.** PL emission from surfactant solution and product suspensions, where HP stands for hydrothermal processing.

**Table S1.** Quantum yield estimations

| Sample           | Solvent                              | Refractive Index | Absorbance at 320 nm | Integrated emission | Quantum Yield    |
|------------------|--------------------------------------|------------------|----------------------|---------------------|------------------|
| Quinine sulphate | 0.1 M H <sub>2</sub> SO <sub>4</sub> | 1.33             | 0.0937               | 51806.6             | 54% <sup>2</sup> |
| 0.8 mM sample    | MilliQ                               | 1.33             | 0.0905               | 1815.6              | 1.96%            |

## References

1. G. Wang, B. Huang, Z. Li, Z. Lou, Z. Wang, Y. Dai and M.-H. Whangbo, *Sci. Rep.*, 2015, **5**, 8544.
2. W. H. Melhuish, *J. Phys. Chem.*, 1961, **65**, 229-235.
